# Supplementary material
Source: PubMed Central journal article supplement (PMC4876311)
Supplement: supp_JCO.2013.50.8515_Supplementary_Appendix_JCO.2013.50.8515.pdf [file supp_JCO.2013.50.8515_Supplementary_Appendix_JCO.2013.50.8515.pdf]

## SUPPLEMENTARY APPENDIX

### CD49d is the strongest flow cytometry-based predictor of overall survival in chronic lymphocytic leukemia

Pietro Bulian<sup>1\*</sup>, Tait D. Shanafelt<sup>2\*</sup>, Chris Fegan<sup>3</sup>, Antonella Zucchetto<sup>1</sup>, Lilla Cro<sup>4</sup>, Holger Nüchel<sup>5</sup>, Luca Baldini<sup>6</sup>, Antonina V. Kurtova<sup>7</sup>, Alessandra Ferrajoli<sup>7</sup>, Jan A. Burger<sup>7</sup>, Gianluca Gaidano<sup>8</sup>, Giovanni Del Poeta<sup>9</sup>, Chris Pepper<sup>3</sup>, Davide Rossi<sup>8\*</sup> and Valter Gattei<sup>1\*</sup>

<sup>1</sup>Clinical and Experimental Onco-Hematology Unit, IRCCS , Centro di Riferimento Oncologico, Aviano, Italy; <sup>2</sup>Mayo Research Center, Rochester, NY; <sup>3</sup>Institute of Cancer & Genetics, Cardiff University, School of Medicine, Cardiff, UK; <sup>4</sup>Servizio di Citometria, Laboratorio di Analisi Chimico-Cliniche e Microbiologia, Fondazione IRCCS Cà Granda, Ospedale Maggiore Policlinico, Milan, Italy; <sup>5</sup>Department of Hematology, University of Duisburg-Essen, Germany; <sup>6</sup>Dipartimento di Scienze Cliniche e di Comunità, Università degli Studi, UO Ematologia, Fondazione IRCCS Cà Granda, Ospedale Maggiore Policlinico, Milan, Italy; <sup>7</sup>University of Texas MD Anderson Cancer Center, Houston, TX; <sup>8</sup>Division of Hematology, Department of Translational Medicine, Amedeo Avogadro University of Eastern Piedmont, Novara, Italy; <sup>9</sup>Division of Hematology, Tor Vergata University, S. Eugenio Hospital, Rome, Italy

\* equally contributed to this work

#### SUPPLEMENTARY APPENDIX CONTENT

**Supplementary Methods**, page 2

**Supplementary Results**, page 3

**Supplementary References**, page 4

**Table S1**. PRISMA checklist, page 5

**Table S2**. Individual study results, page 7

**Table S3**. CD49d flow cytometry analysis and CD49d cut off determination, page 8

**Table S4**. Validation of CD49d cut-off, page 9

**Table S5**. Multivariate Cox regression analysis of OS without CD49d, page 10

**Table S6**. Matrix of pairwise correlations, page 11

**Table S7**. Prognostic importance of clinico-biological variables in the multivariate model, page 12

**Table S8**. Multivariate Cox regression analysis of OS. Cases selected after exclusion of ALC and  $\beta$ 2M, page 13

**Table S9**. Multivariate Cox regression analysis of TFS, page 14

#### Supplementary Figure Legends

**Fig. S1**. Scatter plot of CD49d expression in paired samples collected at two different time-points; grey squares, first sample at diagnosis, second samples before therapy (99 cases); black squares, first sample at diagnosis, second samples at relapse (5 cases).

**Fig. S2**. Funnel plot showing the relationship between the hazard ratio for overall survival of all studies (x-axis) and the precision of the study estimate (standard error, y-axis). Filled circles: published series; open triangles: unpublished series.

**Fig. S3**. OS (A) and TFS (B) Kaplan-Meier plot of CLL prognostic categories defined by expression of CD38, ZAP-70, *IGHV* mutational status, presence of high-risk chromosomal aberrations (Del17p or Del11q). IG M, mutated *IGHV*; IG UM, unmutated *IGHV*; FISH-, Del17p negative and Del11q negative; FISH+, Del17p positive or Del11q positive.

**Fig. S4**. OS Kaplan-Meier plot of patients with complete data (n=1,117) vs patients with at least one prognostic variable missing (n=1,855) (A); distribution of main clinico-biological prognostic variables between complete and missing data patient's subsets (B); p value<0.01 only for Del17p.

**Fig. S5**. Meta-analysis and funnel plot of ZAP-70 (A, B) and CD38 (C, D) as prognostic factors for overall survival. Solid boxes indicate the HR in each study with dimensions proportional to weights (inverse of variance), horizontal lines indicate 95% confidence interval, the diamond indicates the pooled HR. Filled circles: published series; open triangles: unpublished series.

**Fig. S6**. Tree model for flow-cytometry measured prognostic variables in early stage patients (A), patients below 65 years of age (B), patients belonging to the validation cohort only (C).

## Supplementary Methods

### *Determination of the optimal CD49d prognostic cut-off and CD49d recoding*

Data on CD49d were available both as a binary variable coded in each study according to the specific cut-off employed by the authors, and as a continuous variable, as percentage of CD49d positive CLL cells. To compare different CD49d cut-offs and to determine the optimal cut-point, we divided the IPD in two cohorts of published and unpublished data, to be used as test and validation set, respectively. In the training set, we first examined the functional form of the relation between CD49d and OS in martingale residual plot (1-3), which shows the excess mortality (y axis) against the whole range of CD49d percentage values (x axis), with a superimposed line of locally weighted scatterplot smoothing (lowess) fit. Second, to identify an optimal cut-off, we applied a data-driven method (i.e. median) and three outcome-driven methods in each study set individually and in the merged data set. The three outcome-driven methods used were (Maxstat) (4), recursive partitioning (Rpart) (5, 6) and maximal concordance index (C-index) (7). The validation set was then used to test and compare the predictive accuracy of each candidate cut-off by evaluating the C-index (2). Finally, data from published and unpublished cohorts were pooled after recoding all CD49d values with the validated cut-off. To assess the relative contribution of prognostic variables to the final multivariate Cox model we evaluated the change in the degree of correct classification by Net Reclassification Improvement (8) in models excluding each variable in turn.

### *Evaluation of heterogeneity and study quality in pooled analysis*

Study heterogeneity was evaluated by Q test and  $I^2$  statistic, considering a Q test p value  $<0.05$  and an  $I^2$  value  $>50\%$  as indicative of substantial heterogeneity. Study quality was scored by the availability of the following information (9, 10): 1) inclusion criteria; 2) exclusion criteria; 3) prospective or retrospective study; 4) description of patients characteristics; 5) description of CD49d assay; 6) definition of end-point; 7) indication of follow-up time; 8) patients lost at follow-up. The highest score (8) identified the highest study quality. Risk of publication bias was assessed by inspection of funnel plots. Since the number of individual studies was relatively small, we did not test asymmetry on funnel plots (11, 12).

### *Recursive partitioning*

Recursive partitioning (5, 6) was used to study the relative prognostic importance of CD38, ZAP-70 and CD49d. We initially allowed a full-grown tree by setting the complexity parameter at 0.00. Then, we pruned the tree using ten-fold cross-validation to determine the best tree size. The best number of splits was identified as that showing a cross-validation error lower than the smallest cross validation error plus the corresponding standard error (5). Tree instability was investigated with a bootstrapping approach as implemented in R in the package randomSurvivalForest (13). One thousand bootstrap samples were used to rank the importance of each variable by computing the prediction error increase associated to that variable and the minimal depth (how deep in the tree the split based on that variable occurs).

## Supplementary Results

### *CD49d flow cytometry analysis*

Three different anti-CD49d monoclonal antibody (mAb) clones from four different companies were used, either conjugated with phycoerythrin (PE) or fluorescein-isothiocyanate (FITC). Three-color and 2-color analyses were performed in five and three studies, respectively (Table S3). The use of different CD49d mAb clones and fluorochromes had no impact in the flow cytometry assay of CD49d. In particular, the fraction of CD49d positive cases was 37% for assays performed with the mAb clone 9F10 versus 36% with other mAb clones ( $\chi^2$ : p=0.78), and 37% for assays performed with PE mAb vs. 35% with FITC ( $\chi^2$ : p=0.57). Finally, the usage of specific mAb clones and fluorochromes had no effect in the prognostic power of CD49d (interaction p=0.81 and 0.15, respectively).

### *Prognostic impact of CD49d in validation cohort*

In the validation cohort, we found nearly identical estimates to those of the pooled data. In detail, 5-year OS was 95% in CD49d<sup>-</sup> CLL versus 88% in CD49d<sup>+</sup> CLL, 10-year OS was 85% in CD49d<sup>-</sup> CLL versus 70% in CD49d<sup>+</sup> CLL; 5-year TFS was 69% in CD49d<sup>-</sup> CLL versus 43% in CD49d<sup>+</sup> CLL, 10-year TFS was 53% in CD49d<sup>-</sup> CLL versus 25% in CD49d<sup>+</sup> CLL.

## Supplementary References

1. Harrell FE, Jr, Lee KL, Mark DB. Multivariable prognostic models: Issues in developing models, evaluating assumptions and adequacy, and measuring and reducing errors. *Stat Med*. 1996 Feb 28;15(4):361-87.
2. Harrell FE. *Regression modeling strategies*. New York: Springer; 2001.
3. Williams B, Mandrekar J, Mandrekar S, Cha S, Furth A. Technical report series no. 79. finding optimal cutpoints for continuous covariates with binary and time-to-event outcomes. Rochester, Minnesota: Department of Health Science Research, Mayo Clinic; 2006 [cited 2012].
4. Hothorn T, Lausen B. On the exact distribution of maximally selected rank statistics. *Computational Statistics and Data Analysis*. 2003;43:121.
5. Venables W, Ripley B. *Modern applied statistics with S*. New York: Springer-Verlag; 2002.
6. Therneau T, Atkinson E. Technical report series no. 61. an introduction to recursive partitioning using the RPART routines. Rochester, Minnesota: Department of Health Science Research, Mayo Clinic; 1997 [cited 2012].
7. Gonen M, Sima C. Optimal cutpoint estimation with censored data. [Internet]. 2008:5.12.2012. Available from: <http://biostats.bepress.com/mskccbiostat/paper16>.
8. Pencina MJ, D'Agostino RB, Steyerberg EW. Extensions of net reclassification improvement calculations to measure usefulness of new biomarkers. *Stat Med* 2011;30:11-21.
9. McShane LM, Altman DG, Sauerbrei W, Taube SE, Gion M, Clark GM, et al. REporting recommendations for tumour MARKer prognostic studies (REMARK). *Br J Cancer*. 2005 Aug 22;93(4):387-91.
10. Altman DG, McShane LM, Sauerbrei W, Taube SE. Reporting recommendations for tumor marker prognostic studies (REMARK): Explanation and elaboration. *PLoS Med*. 2012;9(5):e1001216.
11. Egger M, Davey Smith G, Schneider M, Minder C. Bias in meta-analysis detected by a simple, graphical test. *BMJ*. 1997 Sep 13;315(7109):629-34.
12. Sterne JA, Sutton AJ, Ioannidis JP, Terrin N, Jones DR, Lau J, et al. Recommendations for examining and interpreting funnel plot asymmetry in meta-analyses of randomised controlled trials. *BMJ*. 2011 Jul 22;343:d4002.
13. Ishwaran H, Kogalur U, Blackstone E, Lauer M. Random survival forests. *The annals of applied statistics*. 2008;2:841.

**Table S1.** PRISMA checklist; page 1 of 2

| Section/topic                      | #  | Checklist item                                                                                                                                                                                                                                                                                              | Reported on page # |
|------------------------------------|----|-------------------------------------------------------------------------------------------------------------------------------------------------------------------------------------------------------------------------------------------------------------------------------------------------------------|--------------------|
| <b>TITLE</b>                       |    |                                                                                                                                                                                                                                                                                                             |                    |
| Title                              | 1  | Identify the report as a systematic review, meta-analysis, or both.                                                                                                                                                                                                                                         |                    |
| <b>ABSTRACT</b>                    |    |                                                                                                                                                                                                                                                                                                             |                    |
| Structured summary                 | 2  | Provide a structured summary including, as applicable: background; objectives; data sources; study eligibility criteria, participants, and interventions; study appraisal and synthesis methods; results; limitations; conclusions and implications of key findings; systematic review registration number. | 2                  |
| <b>INTRODUCTION</b>                |    |                                                                                                                                                                                                                                                                                                             |                    |
| Rationale                          | 3  | Describe the rationale for the review in the context of what is already known.                                                                                                                                                                                                                              | 3                  |
| Objectives                         | 4  | Provide an explicit statement of questions being addressed with reference to participants, interventions, comparisons, outcomes, and study design (PICOS).                                                                                                                                                  | 3                  |
| <b>METHODS</b>                     |    |                                                                                                                                                                                                                                                                                                             |                    |
| Protocol and registration          | 5  | Indicate if a review protocol exists, if and where it can be accessed (e.g., Web address), and, if available, provide registration information including registration number.                                                                                                                               | 5                  |
| Eligibility criteria               | 6  | Specify study characteristics (e.g., PICOS, length of follow-up) and report characteristics (e.g., years considered, language, publication status) used as criteria for eligibility, giving rationale.                                                                                                      | 4                  |
| Information sources                | 7  | Describe all information sources (e.g., databases with dates of coverage, contact with study authors to identify additional studies) in the search and date last searched.                                                                                                                                  | 4                  |
| Search                             | 8  | Present full electronic search strategy for at least one database, including any limits used, such that it could be repeated.                                                                                                                                                                               | 4                  |
| Study selection                    | 9  | State the process for selecting studies (i.e., screening, eligibility, included in systematic review, and, if applicable, included in the meta-analysis).                                                                                                                                                   | 4, fig 1           |
| Data collection process            | 10 | Describe method of data extraction from reports (e.g., piloted forms, independently, in duplicate) and any processes for obtaining and confirming data from investigators.                                                                                                                                  | 4, fig 1           |
| Data items                         | 11 | List and define all variables for which data were sought (e.g., PICOS, funding sources) and any assumptions and simplifications made.                                                                                                                                                                       | table 1            |
| Risk of bias in individual studies | 12 | Describe methods used for assessing risk of bias of individual studies (including specification of whether this was done at the study or outcome level), and how this information is to be used in any data synthesis.                                                                                      | 5,6                |
| Summary measures                   | 13 | State the principal summary measures (e.g., risk ratio, difference in means).                                                                                                                                                                                                                               | 5,6                |
| Synthesis of results               | 14 | Describe the methods of handling data and combining results of studies, if done, including measures of consistency (e.g., $I^2$ ) for each meta-analysis.                                                                                                                                                   | 5,6                |

**Table S1.** PRISMA checklist; pag 2 of 2

| Section/topic                 | #  | Checklist item                                                                                                                                                                                           | Reported on page #    |
|-------------------------------|----|----------------------------------------------------------------------------------------------------------------------------------------------------------------------------------------------------------|-----------------------|
| Risk of bias across studies   | 15 | Specify any assessment of risk of bias that may affect the cumulative evidence (e.g., publication bias, selective reporting within studies).                                                             | 5,6, fig S1           |
| Additional analyses           | 16 | Describe methods of additional analyses (e.g., sensitivity or subgroup analyses, meta-regression), if done, indicating which were pre-specified.                                                         | 5,6                   |
| <b>RESULTS</b>                |    |                                                                                                                                                                                                          |                       |
| Study selection               | 17 | Give numbers of studies screened, assessed for eligibility, and included in the review, with reasons for exclusions at each stage, ideally with a flow diagram.                                          | 4                     |
| Study characteristics         | 18 | For each study, present characteristics for which data were extracted (e.g., study size, PICOS, follow-up period) and provide the citations.                                                             |                       |
| Risk of bias within studies   | 19 | Present data on risk of bias of each study and, if available, any outcome level assessment (see item 12).                                                                                                |                       |
| Results of individual studies | 20 | For all outcomes considered (benefits or harms), present, for each study: (a) simple summary data for each intervention group (b) effect estimates and confidence intervals, ideally with a forest plot. | fig 2, fig 3          |
| Synthesis of results          | 21 | Present results of each meta-analysis done, including confidence intervals and measures of consistency.                                                                                                  | 8, fig 2, fig S5      |
| Risk of bias across studies   | 22 | Present results of any assessment of risk of bias across studies (see Item 15).                                                                                                                          | 8                     |
| Additional analysis           | 23 | Give results of additional analyses, if done (e.g., sensitivity or subgroup analyses, meta-regression [see Item 16]).                                                                                    | 9,10,11, fig4, fig S6 |
| <b>DISCUSSION</b>             |    |                                                                                                                                                                                                          |                       |
| Summary of evidence           | 24 | Summarize the main findings including the strength of evidence for each main outcome; consider their relevance to key groups (e.g., healthcare providers, users, and policy makers).                     | 12,13                 |
| Limitations                   | 25 | Discuss limitations at study and outcome level (e.g., risk of bias), and at review-level (e.g., incomplete retrieval of identified research, reporting bias).                                            | 12,13                 |
| Conclusions                   | 26 | Provide a general interpretation of the results in the context of other evidence, and implications for future research.                                                                                  | 12,13                 |
| <b>FUNDING</b>                |    |                                                                                                                                                                                                          |                       |
| Funding                       | 27 | Describe sources of funding for the systematic review and other support (e.g., supply of data); role of funders for the systematic review.                                                               | none                  |

From: Moher D, Liberati A, Tetzlaff J, Altman DG, The PRISMA Group (2009). Preferred Reporting Items for Systematic Reviews and Meta-Analyses: The PRISMA Statement. PLoS Med 6(6): e1000097. doi:10.1371/journal.pmed1000097

For more information, visit: [www.prisma-statement.org](http://www.prisma-statement.org).

**Table S2.** Individual study results

---

|                       | CD49d predicts |           | CD49d <sup>+</sup> cases | CD49d cut-off | cut-off <sup>†</sup> |
|-----------------------|----------------|-----------|--------------------------|---------------|----------------------|
|                       | short OS       | short TFS | %                        | %             | method               |
| <hr/>                 |                |           |                          |               |                      |
| published cohort      |                |           |                          |               |                      |
| Gattei et al. 2008    | yes            | yes       | 43                       | 30            | Maxstat              |
| Shanafelt et al. 2008 | yes            | yes       | 23                       | 45            | Rpart                |
| Rossi et al. 2008     | nd             | yes       | 39                       | 30            | ref #10              |
| Nuckel et al. 2009    | yes            | yes       | 63                       | 45            | ROC                  |
| Kurtova et al. 2009   | nd             | nd        | 31                       | 30            | ref #10              |
| Cro et al. 2010       | nd             | nd        | 29                       | 30            | ref #10              |
| Shanafelt et al. 2011 | nd             | nd        | 33                       | 45            | ref #11              |
| Majid et al. 2011     | yes            | yes       | 35                       | 30            | ref #10              |

---

tabulated values estimated on IPD included in metanalysis.

<sup>†</sup> CD49d cut off was determined by maximally selected rank statistics (Maxstat), recursive partitioning (Rpart), receiver operating characteristic (ROC) or chosen according to the indicated reference.

nd: not determined

**Table S3.** CD49d flow cytometry analysis and CD49d cut off determination according to different statistical procedures.

|                       | Cytometry | Monoclonal Antibody |         |        | CD49d cut-off (%) |         |       |         |
|-----------------------|-----------|---------------------|---------|--------|-------------------|---------|-------|---------|
|                       |           | Clone               | Source  | Format | Median            | Maxstat | Rpart | C-index |
| Gattei et.al 2008     | 3-col     | 9F10                | BD      | PE     | 20                | 7       | 31    | 32      |
| Shanafelt et al. 2008 | 2-col     | 9F10                | BD      | PE     | 6                 | 43      | 45    | 48      |
| Rossi et al. 2008     | 3-col     | 9F10                | BD      | PE     | 15                | 8       | 8     | 9       |
| Nuckel et al. 2009    | 2-col     | 44H6                | ACRIS   | FITC   | 11                | 89      | 6     | 8       |
| Kurtova et al. 2009   | 3-col     | 9F10                | BD      | PE     | 3                 | 33      | 38    | 6       |
| Cro et al. 2010       | 3-col     | HP 2/1              | BC      | FITC   | 0                 | 10      | 10    | 11      |
| Shanafelt et al. 2011 | 2-col     | 9F10                | BD      | PE     | 12                | 85      | 85    | 86      |
| Majid et al. 2011     | 3-col     | 44H6                | SEROTEC | PE     | 9                 | 22      | 23    | 23      |
| merged data           |           |                     |         |        | 10                | 31      | 31    | 23      |

<sup>\$</sup> Maxstat, Rpart, C-index were applied on OS data in the cohorts related to each published study.

na: not available; PE, phycoerithrin; FITC, fluorescein; BD, Becton Dickinson; BC, Beckman Coulter; 3-col, 3 color; 2-col, 2 color



**Table S4.** Validation of CD49d cut-off

|              | Model-1: cut-off $\geq 30\%$ |          |              | Model-2: cut-off $\geq 45\%$ |          |              | Patients changing CD49d status <sup>#</sup> |
|--------------|------------------------------|----------|--------------|------------------------------|----------|--------------|---------------------------------------------|
|              | HR <sup>\$</sup>             | p        | CD49d+ cases | HR <sup>\$</sup>             | p        | CD49d+ cases | %                                           |
|              |                              |          | %            |                              |          | %            |                                             |
| Shanafelt    | 2.38                         | 0.00001  | 35           | 2.62                         | <0.00001 | 31           | 4                                           |
| Pepper       | 2.87                         | 0.01447  | 30           | 3.27                         | 0.00921  | 21           | 9                                           |
| Del Poeta    | 3.68                         | 0.03075  | 43           | 2.80                         | 0.07941  | 40           | 3                                           |
| Rossi        | 3.84                         | 0.00445  | 35           | 3.09                         | 0.01569  | 34           | 1                                           |
| merged data* | 2.50                         | <0.00001 | 35           | 2.49                         | <0.00001 | 32           | 3                                           |

Analysis performed on the set of 1416 unpublished IPD.

<sup>#</sup> Patients changing CD49d status (from positive to negative) when using 30% versus 45% cut-off

<sup>\$</sup> CD49d HR for shorter OS.

\* Cox models stratified by study site. C-index ( $\geq 30\%$  cut-off) = 0.61; C-index ( $\geq 45\%$  cut-off) = 0.59 (p<0.0001)

**Table S5.** Multivariate Cox regression analysis of OS without CD49d

|                           | Final reduced model |             |                     | Initial full model |             |                    | Univariate model |             |                    |
|---------------------------|---------------------|-------------|---------------------|--------------------|-------------|--------------------|------------------|-------------|--------------------|
|                           | HR                  | 95% CI      | p                   | HR                 | 95% CI      | p                  | HR               | 95% CI      | p                  |
| Age >65years              | 2.97                | 2.01 - 4.39 | 5 x10 <sup>-8</sup> | 2.77               | 1.85 – 4.15 | 7x10 <sup>-7</sup> | 2.75             | 1.87 - 4.02 | 2x10 <sup>-7</sup> |
| UM <i>IGHV</i>            | 1.95                | 1.28 - 2.99 | 0.0020              | 1.93               | 1.25 – 2.97 | 0.0029             | 2.64             | 1.81 - 3.85 | 5x10 <sup>-7</sup> |
| Del 17p                   | 2.67                | 1.46 - 3.52 | 0.0002              | 2.24               | 1.42 – 3.54 | 0.0005             | 2.90             | 1.87 - 4.49 | 2x10 <sup>-6</sup> |
| Gender (M)                | 1.70                | 1.15 - 2.49 | 0.0071              | 1.67               | 1.13 – 2.45 | 0.0093             | 1.53             | 1.06 - 2.22 | 0.0241             |
| ALC>15x10 <sup>9</sup> /L | 1.55                | 1.04 - 2.31 | 0.0319              | 1.48               | 0.99 – 2.22 | 0.06               | 1.55             | 1.05 - 2.30 | 0.0290             |
| ZAP-70                    | 1.60                | 1.06 - 2.41 | 0.0240              | 1.55               | 1.03 – 2.36 | 0.0376             | 2.27             | 1.57 - 3.27 | 1x10 <sup>-5</sup> |
| β2M above ULN             | -                   | -           | -                   | 1.34               | 0.85 – 2.10 | 0.21               | 2.23             | 1.47 - 3.40 | 0.0002             |
| CD38                      | 1.56                | 1.08 - 2.26 | 0.0176              | 1.53               | 1.06 – 2.22 | 0.0238             | 1.98             | 1.38 - 2.82 | 0.0002             |
| Del 11q                   | -                   | -           | -                   | 1.10               | 0.64 – 1.88 | 0.73               | 1.35             | 0.82 - 2.23 | 0.24               |

Final model: multivariate analysis with backward stepwise elimination of non significant predictors. All models were stratified by study site and clinical stage. Total cases included: 1,117, events 137.

HR, hazard ratio; CI, confidence interval; UM, unmutated; M, male; ALC, absolute lymphocyte count; β2M, β2-microglobulin; ULN, upper limit of normal

**Table S6.** Matrix of pairwise correlations

|             |     | CD49d        |             | CD38                            |             | ZAP-70                          |             | <i>IGHV</i>                     |    |
|-------------|-----|--------------|-------------|---------------------------------|-------------|---------------------------------|-------------|---------------------------------|----|
|             |     | neg          | pos         | neg                             | pos         | neg                             | pos         | M                               | UM |
| CD49d       | neg |              |             | k=0.43<br>p=3x10 <sup>-10</sup> |             | k=0.43<br>p=0.018               |             | k=0.22<br>p=0.12                |    |
|             | pos |              |             |                                 |             |                                 |             |                                 |    |
| CD38        | neg | 1316<br>(53) | 398<br>(16) |                                 |             | k=0.32<br>p=3x10 <sup>-16</sup> |             | k=0.34<br>p=3x10 <sup>-10</sup> |    |
|             | pos | 238<br>(10)  | 522<br>(21) |                                 |             |                                 |             |                                 |    |
| ZAP-70      | neg | 1089<br>(44) | 395<br>(16) | 1209<br>(49)                    | 275<br>(11) |                                 |             | k=0.42<br>p=0.32                |    |
|             | pos | 465<br>(19)  | 525<br>(21) | 505<br>(20)                     | 485<br>(20) |                                 |             |                                 |    |
| <i>IGHV</i> | M   | 889<br>(43)  | 359<br>(17) | 1011<br>(49)                    | 237<br>(11) | 948<br>(46)                     | 300<br>(15) |                                 |    |
|             | U   | 403          | 417         | 396                             | 424         | 275                             | 545         |                                 |    |
|             | M   | (19)         | (20)        | (19)                            | (21)        | (13)                            | (26)        |                                 |    |

Number (percentage) of cases are tabulated in the lower-left quadrants of the table; the relative statistics (k, Cohen kappa coefficient; p, McNemar test) are indicated in the symmetric correspondent upper-right quadrants.

M, mutated; UM, unmutated; pos, positive; neg, negative

**Table S7.** Prognostic importance of clinico-biological variables in the multivariate model.

| Variable deleted          | LL    | LR   | p                  | C-index | p                  | NRI (%) | p     |
|---------------------------|-------|------|--------------------|---------|--------------------|---------|-------|
| none (final model)        | 450.7 | -    | -                  | 0.76    | -                  | -       | -     |
| Age >65years              | 469.0 | 36.6 | 1x10 <sup>-9</sup> | 0.71    | 2x10 <sup>-8</sup> | -35     | 0.000 |
| UM <i>IGHV</i>            | 461.5 | 21.6 | 3x10 <sup>-6</sup> | 0.73    | 2x10 <sup>-5</sup> | -29     | 0.000 |
| CD49d≥30%                 | 460.5 | 19.7 | 9x10 <sup>-6</sup> | 0.75    | 7x10 <sup>-5</sup> | -23     | 0.000 |
| Del17p                    | 455.8 | 10.1 | 0.0015             | 0.74    | 0.21               | -15     | 0.21  |
| Gender (M)                | 455.6 | 9.8  | 0.0017             | 0.75    | 7x10 <sup>-5</sup> | -10     | 0.09  |
| ALC>15x10 <sup>9</sup> /L | 453.8 | 6.2  | 0.013              | 0.75    | 1x10 <sup>-5</sup> | -12     | 0.02  |

All models were stratified by study site and clinical stage. Total cases included: 1,117, events 137.

Final model included: Age >65years, *IGHV*, CD49d≥30%, Del17p, Gender, ALC>15x10<sup>9</sup>/L

LL, log-likelihood; LR, log-likelihood ratio, NRI: Net Reclassification Improvement; UM, unmutated; M, male; ALC, absolute lymphocyte count; β2M, β2-microglobulin; ULN, upper limit of normal

**Table S8.** Multivariate Cox regression analysis of OS. Cases selected after exclusion of ALC and  $\beta$ 2M

|                       | Final reduced model |           |                     | Initial full model |           |                     | Univariate |           |                     |
|-----------------------|---------------------|-----------|---------------------|--------------------|-----------|---------------------|------------|-----------|---------------------|
|                       | HR                  | 95% CI    | p                   | HR                 | 95% CI    | p                   | HR         | 95% CI    | p                   |
| <i>CD49d included</i> |                     |           |                     |                    |           |                     |            |           |                     |
| Age >65years          | 2.62                | 1.98-3.47 | $1 \times 10^{-11}$ | 2.67               | 2.02-3.54 | $8 \times 10^{-12}$ | 2.61       | 1.98-3.44 | $9 \times 10^{-12}$ |
| UM <i>IGHV</i>        | 1.66                | 1.24-2.23 | 0.0007              | 1.54               | 1.13-2.09 | 0.0064              | 2.25       | 1.70-2.98 | $1 \times 10^{-8}$  |
| CD49d $\geq$ 30%      | 2.12                | 1.57-2.86 | $2 \times 10^{-6}$  | 2.03               | 1.50-2.75 | $4 \times 10^{-6}$  | 2.58       | 1.97-3.39 | $7 \times 10^{-16}$ |
| Del 17p               | 2.37                | 1.62-3.47 | $9 \times 10^{-6}$  | 2.32               | 1.58-3.40 | $1 \times 10^{-5}$  | 2.66       | 1.82-3.88 | $4 \times 10^{-7}$  |
| Gender (M)            | -                   | -         | -                   | 1.30               | 0.97-1.74 | 0.08                | 1.31       | 0.99-1.74 | 0.058               |
| ZAP-70                | -                   | -         | -                   | 1.29               | 0.94-1.76 | 0.11                | 2.13       | 1.62-2.81 | $8 \times 10^{-8}$  |
| CD38                  | 1.44                | 1.07-1.95 | 0.0169              | 1.40               | 1.03-1.89 | 0.0293              | 2.20       | 1.69-2.88 | $6 \times 10^{-9}$  |
| Del 11q               | 1.74                | 1.18-2.57 | 0.0054              | 1.66               | 1.12-2.46 | $2 \times 10^{-5}$  | 1.80       | 1.24-2.60 | 0.0018              |
| <i>CD49d excluded</i> |                     |           |                     |                    |           |                     |            |           |                     |
| Age >65years          | 2.63                | 1.99-3.48 | $1 \times 10^{-11}$ | 2.67               | 2.02-3.54 | $8 \times 10^{-12}$ |            |           |                     |
| UM <i>IGHV</i>        | 1.59                | 1.17-2.15 | 0.0027              | 1.52               | 1.12-2.06 | 0.0079              |            |           |                     |
| Del 17p               | 2.16                | 1.49-3.13 | $5 \times 10^{-5}$  | 2.27               | 1.55-3.33 | $2 \times 10^{-5}$  |            |           |                     |
| Gender (M)            | -                   | -         | -                   | 1.31               | 0.98-1.76 | 0.07                |            |           |                     |
| ZAP-70                | 1.47                | 1.09-1.99 | 0.0126              | 1.56               | 1.04-1.92 | 0.0281              |            |           |                     |
| CD38                  | 1.87                | 1.41-2.47 | $1 \times 10^{-5}$  | 1.83               | 1.38-2.42 | $2 \times 10^{-5}$  |            |           |                     |
| Del 11q               | -                   | -         | -                   | 1.43               | 0.97-2.11 | 0.07                |            |           |                     |

Final model: multivariate analysis with backward stepwise elimination of non significant predictors. All models were stratified by study site and clinical stage. Total cases included, 1,655; events, 246.

HR: hazard ratio; CI: confidence interval; UM, unmutated; M, male.

Final model with CD49d vs final model without CD49d: log-likelihood ratio chi-square test,  $p < 0.0001$ ; C-index: 0.731 vs 0.729,  $p = 0.0004$

**Table S9.** Multivariate Cox regression analysis of TFS

|                          | final reduced model |             |                     | initial full model |             |                     | univariate model |             |                     |
|--------------------------|---------------------|-------------|---------------------|--------------------|-------------|---------------------|------------------|-------------|---------------------|
|                          | HR                  | 95% CI      | p                   | HR                 | 95% CI      | p                   | HR               | 95% CI      | p                   |
| Age >65years             | -                   | -           | -                   | -                  | -           | -                   | 1.03             | 0.91 – 1.15 | 0.65                |
| UM <i>IGHV</i>           | 1.73                | 1.40 - 2.14 | $5 \times 10^{-7}$  | 1.70               | 1.37 – 2.11 | $1 \times 10^{-6}$  | 2.65             | 2.33 - 3.02 | $2 \times 10^{-16}$ |
| CD49d $\geq$ 30%         | 1.68                | 1.38 - 2.04 | $1 \times 10^{-7}$  | 1.62               | 1.32 – 1.98 | $3 \times 10^{-6}$  | 1.89             | 1.68 - 2.12 | $2 \times 10^{-16}$ |
| Del 17p                  | 1.60                | 1.20 - 2.13 | 0.0012              | 1.62               | 1.22 – 2.16 | 0.0009              | 1.64             | 1.31 - 2.06 | $1 \times 10^{-5}$  |
| Gender (M)               | -                   | -           | -                   | -                  | -           | -                   | 1.01             | 0.89 - 1.14 | 0.89                |
| ALC $>15 \times 10^9$ /L | 2.24                | 1.83 - 2.76 | $1 \times 10^{-14}$ | 2.24               | 1.82 – 2.75 | $2 \times 10^{-14}$ | 1.72             | 1.50 - 1.98 | $1 \times 10^{-14}$ |
| ZAP-70                   | 1.46                | 1.18 – 1.79 | 0.0004              | 1.43               | 1.16 – 1.76 | 0.0008              | 1.87             | 1.65 - 2.12 | $2 \times 10^{-16}$ |
| $\beta$ 2M above ULN     | 1.65                | 1.32 – 2.08 | $1 \times 10^{-5}$  | 1.65               | 0.31 – 2.07 | $2 \times 10^{-5}$  | 2.37             | 1.99 - 2.82 | $2 \times 10^{-16}$ |
| CD38                     | -                   | -           | -                   | 1.13               | 0.92 – 1.40 | 0.23                | 1.90             | 1.69 - 2.14 | $2 \times 10^{-16}$ |
| Del 11q                  | 1.48                | 1.14 – 1.94 | 0.0035              | 1.46               | 1.12 – 1.91 | 0.0055              | 2.02             | 1.68 - 2.41 | $2 \times 10^{-14}$ |

Final model: multivariate analysis with backward stepwise elimination of non significant predictors. All models were stratified by study site and clinical stage. Total cases included: 1,109, events 514.

HR, hazard ratio; CI, confidence interval; UM, unmutated; M, male; ALC, absolute lymphocyte count;  $\beta$ 2M,  $\beta$ 2-microglobulin; ULN, upper limit of normal

**Figure S1**

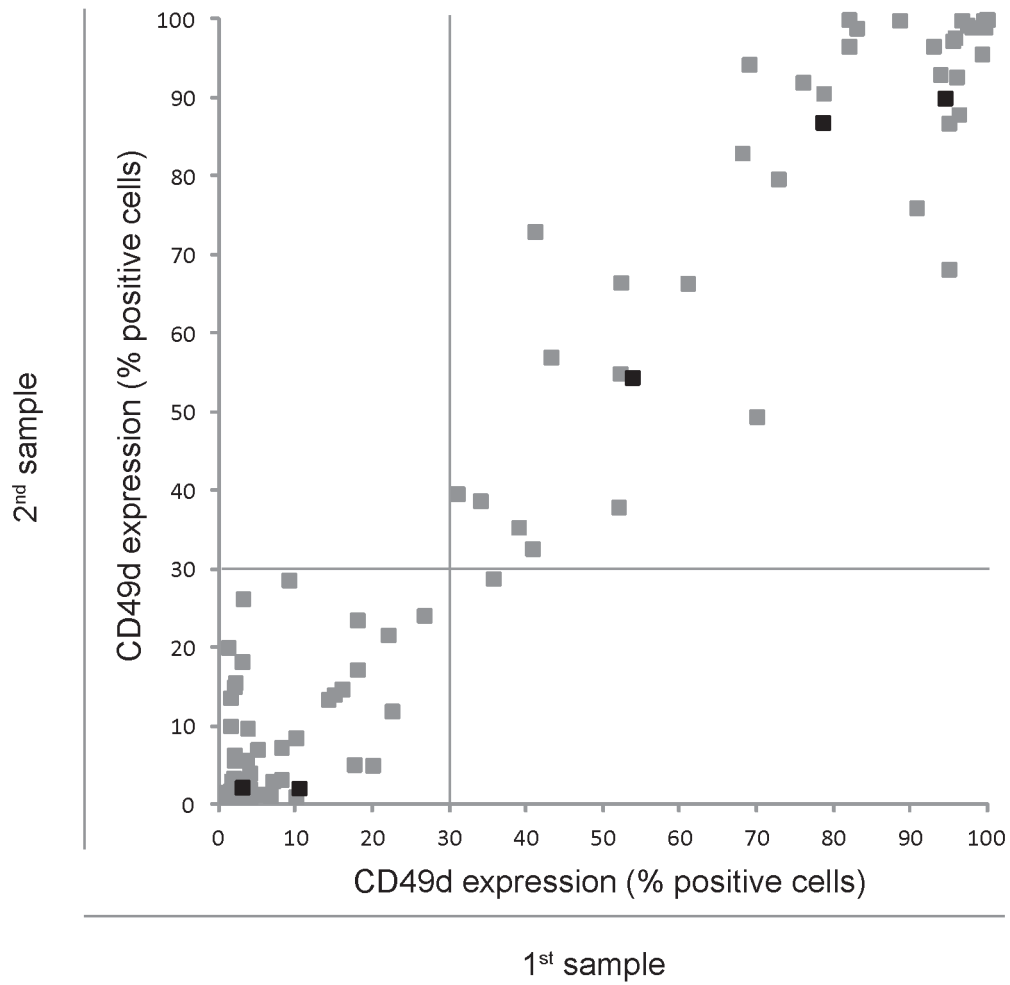

**Scatter plot of CD49d expression in paired samples collected at two different time-points; grey squares, first sample at diagnosis, second samples before therapy (99 cases); black squares, first sample at diagnosis, second samples at relapse (5 cases).**

Figure S2

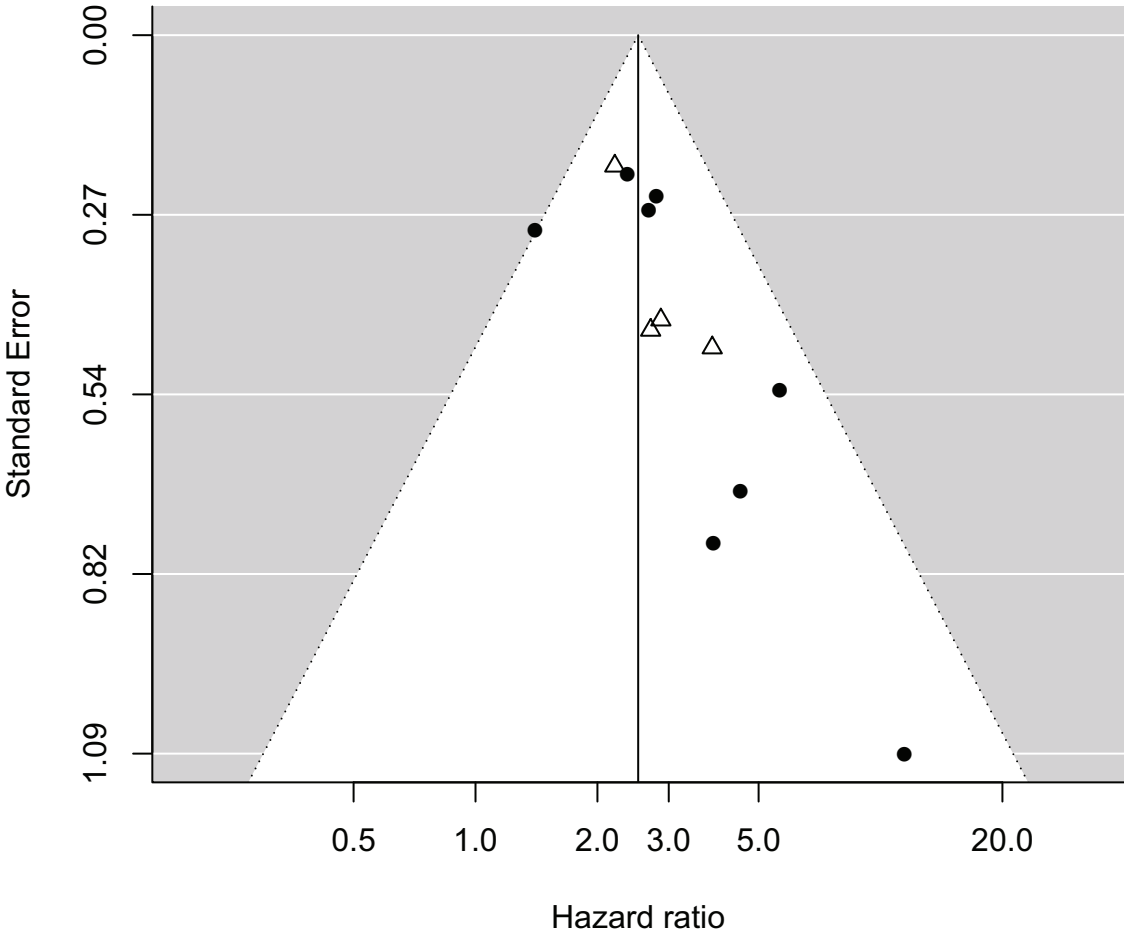

Funnel plot showing the relationship between the hazard ratio for overall survival of all studies (x-axis) and the precision of the study estimate (standard error, y-axis). Filled circles: published series; open triangles: unpublished series.



Figure S3

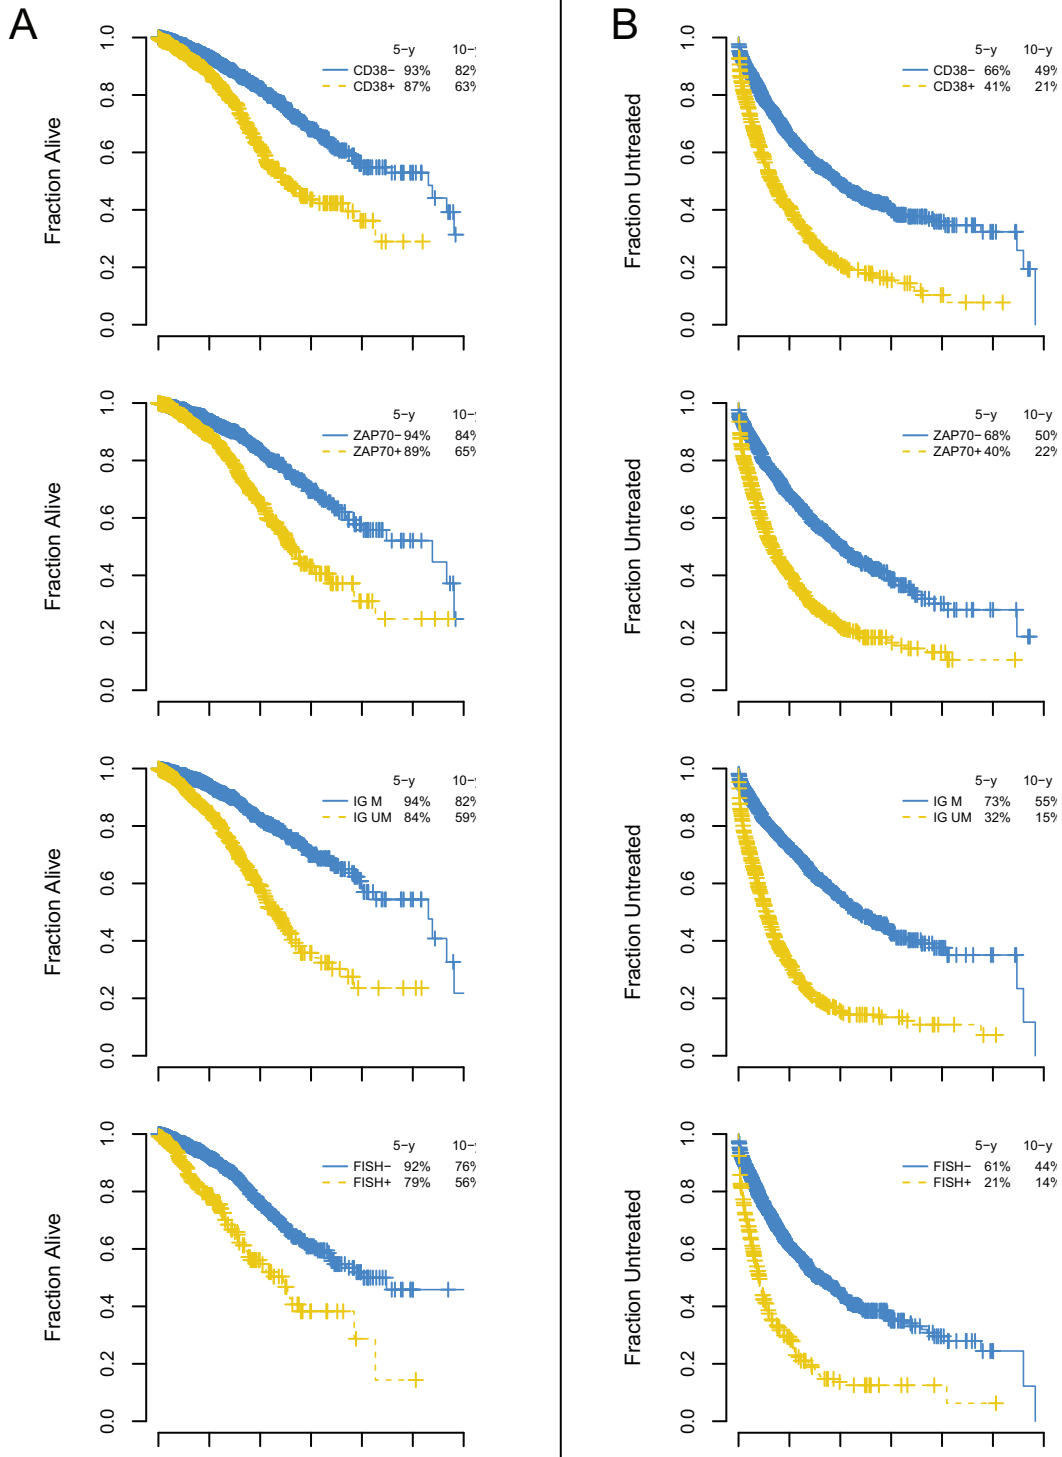

OS (A) and TFS (B) Kaplan-Meier plot of CLL prognostic categories defined by expression of CD38, ZAP-70, IGHV mutational status, presence of high-risk chromosomal aberrations (Del17 or Del11q). IG M, mutated IGHV; IG UM, unmutated IGHV; FISH-, Del17p negative and Del11q negative; FISH+, Del17p positive or Del11q positive.

# Figure S4

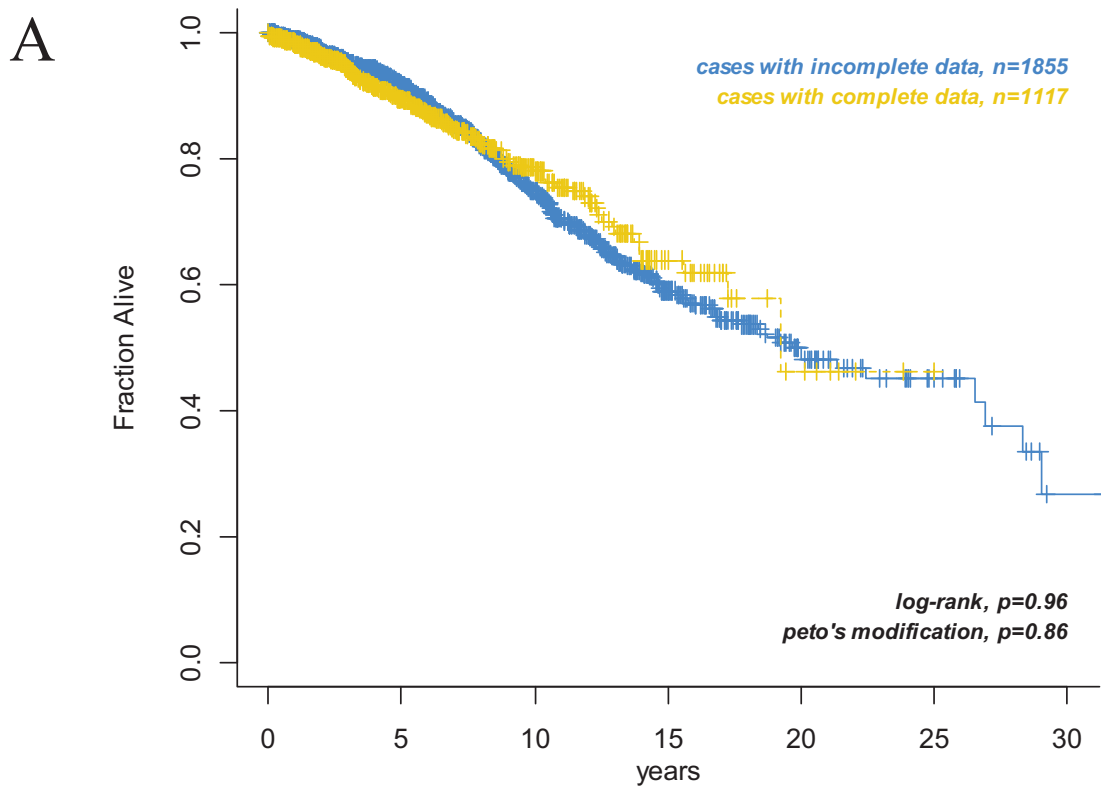

**B**

|                        | complete series (n=1,117) | incomplete series (n=1,1855) | No. available |
|------------------------|---------------------------|------------------------------|---------------|
| Age median, years      | 64                        | 63                           | 2965          |
| Male gender, n (%)     | 678 (61)                  | 1181 (64)                    | 2972          |
| Advanced stages, n (%) | 81 (7)                    | 128 (7)                      | 2956          |
| Del 11q, n (%)         | 115 (10)                  | 108 (9)                      | 2288          |
| Del 17p, n (%)         | 99 (9)                    | 51 (4)                       | 2288          |
| UM IGVH, n (%)         | 446 (40)                  | 519 (39)                     | 2444          |
| ZAP70+, n (%)          | 433 (39)                  | 571 (41)                     | 2495          |
| CD38+, n (%)           | 325 (29)                  | 545 (31)                     | 2866          |
| CD49d+, n (%)          | 432 (39)                  | 666 (36)                     | 2972          |
| 5-year OS, %           | 89                        | 92                           | 2972          |
| 10-year OS, %          | 79                        | 75                           | 2972          |

OS Kaplan-Meier plot of patients with complete data (n=1,117) vs patients with at least one prognostic variable missing (n=1,855) (A); distribution of main clinico-biological prognostic variables between complete and missing data patient's subsets (B); p value<0.01 only for Del17p.

Figure S5

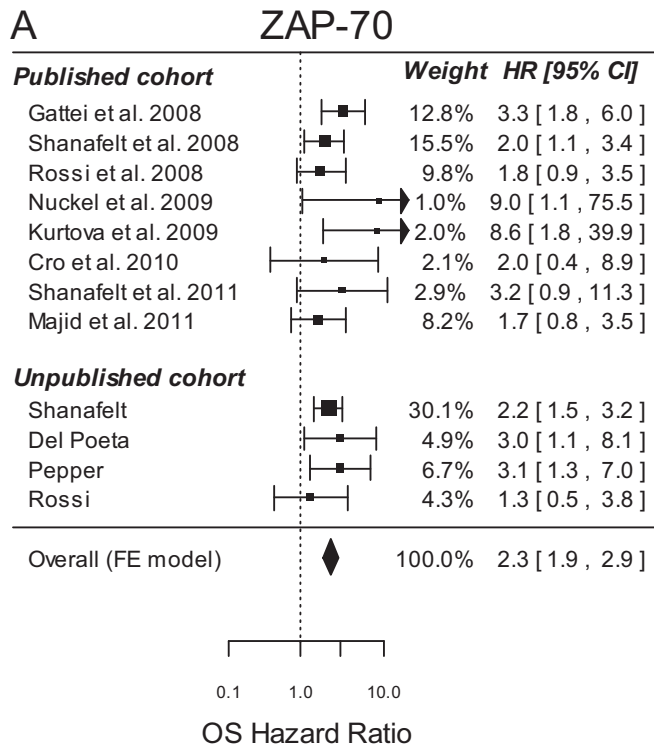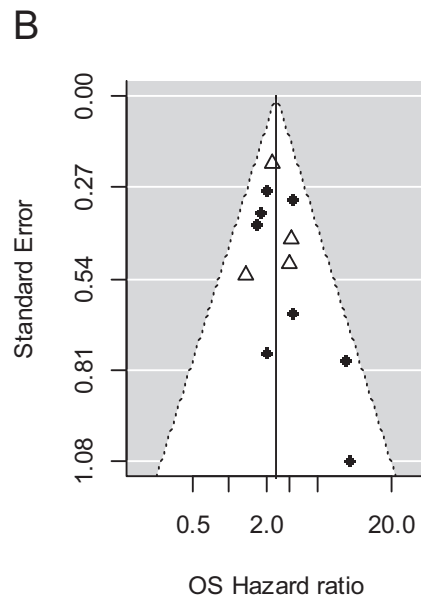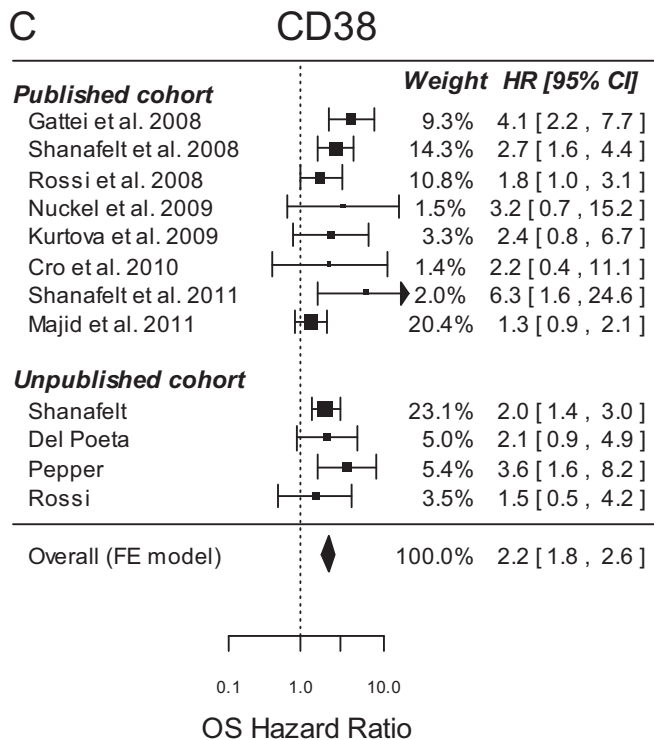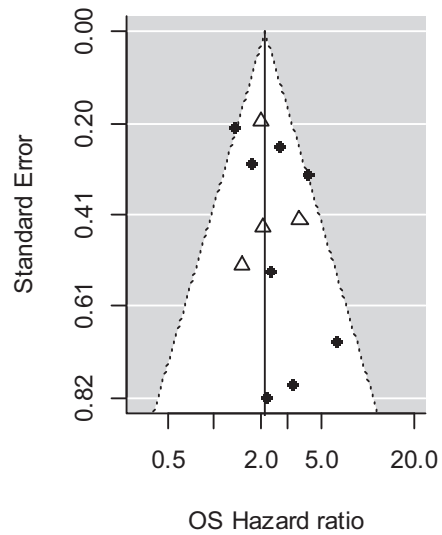

Meta-analysis and funnel plot of ZAP-70 (A, B) and CD38 (C, D) as prognostic factors for overall survival. Solid boxes indicate the HR in each study with dimensions proportional to weights (inverse of variance), horizontal lines indicate 95% confidence interval, the diamond indicates the pooled HR. Filled circles: published series; open triangles: unpublished series

Figure S6

A

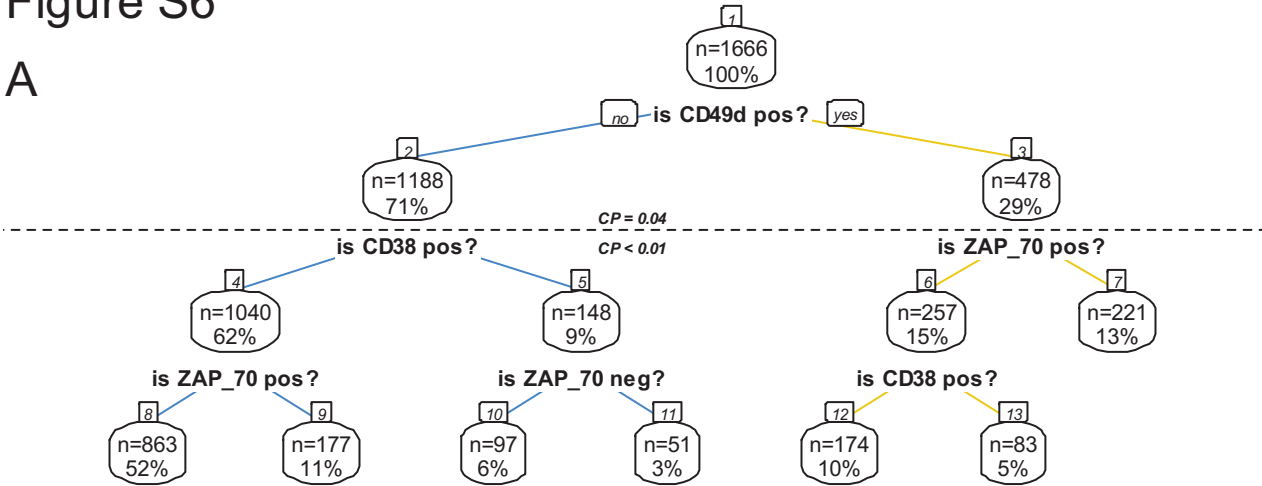

B

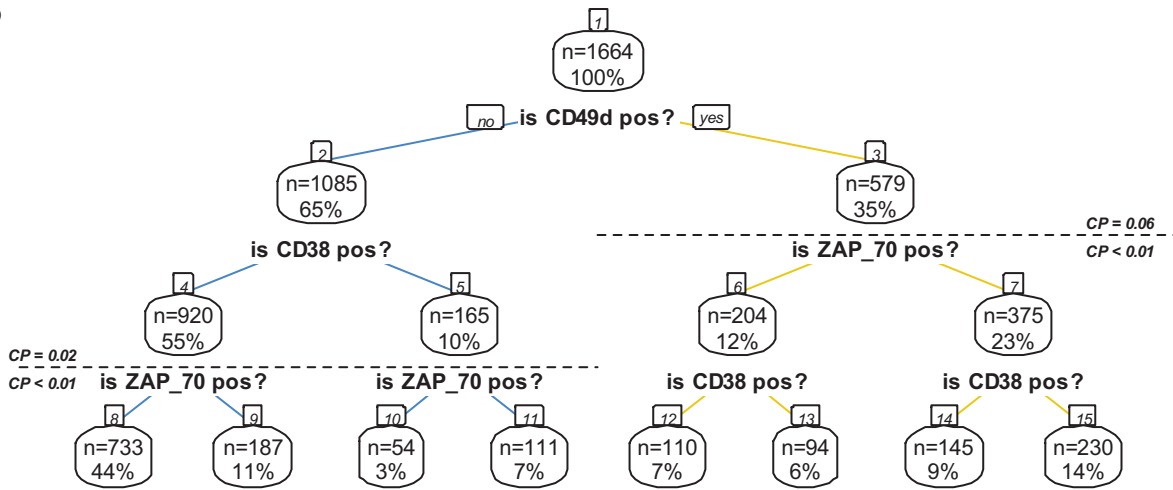

C

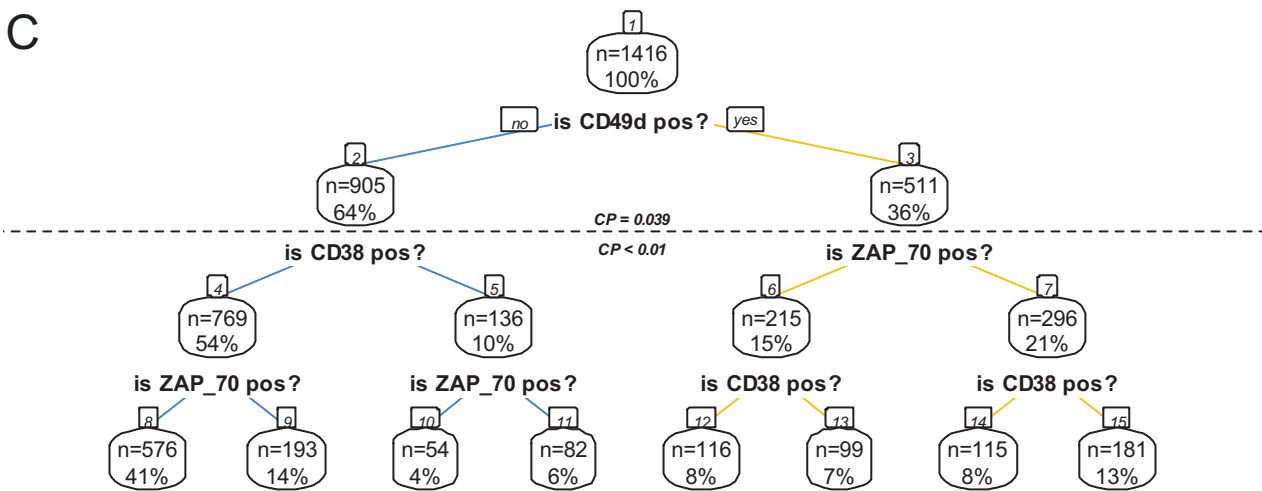

Tree model for flow-cytometry measured prognostic variables in early stage patients (A), patients below 65 years of age (B), patients belonging to the validation cohort only (C).
